# Supplementary material for: PARK15/FBXO7 is dispensable for PINK1/Parkin mitophagy in iNeurons and HeLa cell systems
Source: PubMed Central journal article supplement — EMBO Rep. 2023 Jun 19;24(8):e56399. doi: 10.15252/embr.202256399 (PMC10398645; doi:10.15252/embr.202256399), 2023-06-19
Supplement: EMBR-24-e56399-s004.pdf [file EMBR-24-e56399-s004.pdf]

## Expanded View Figures

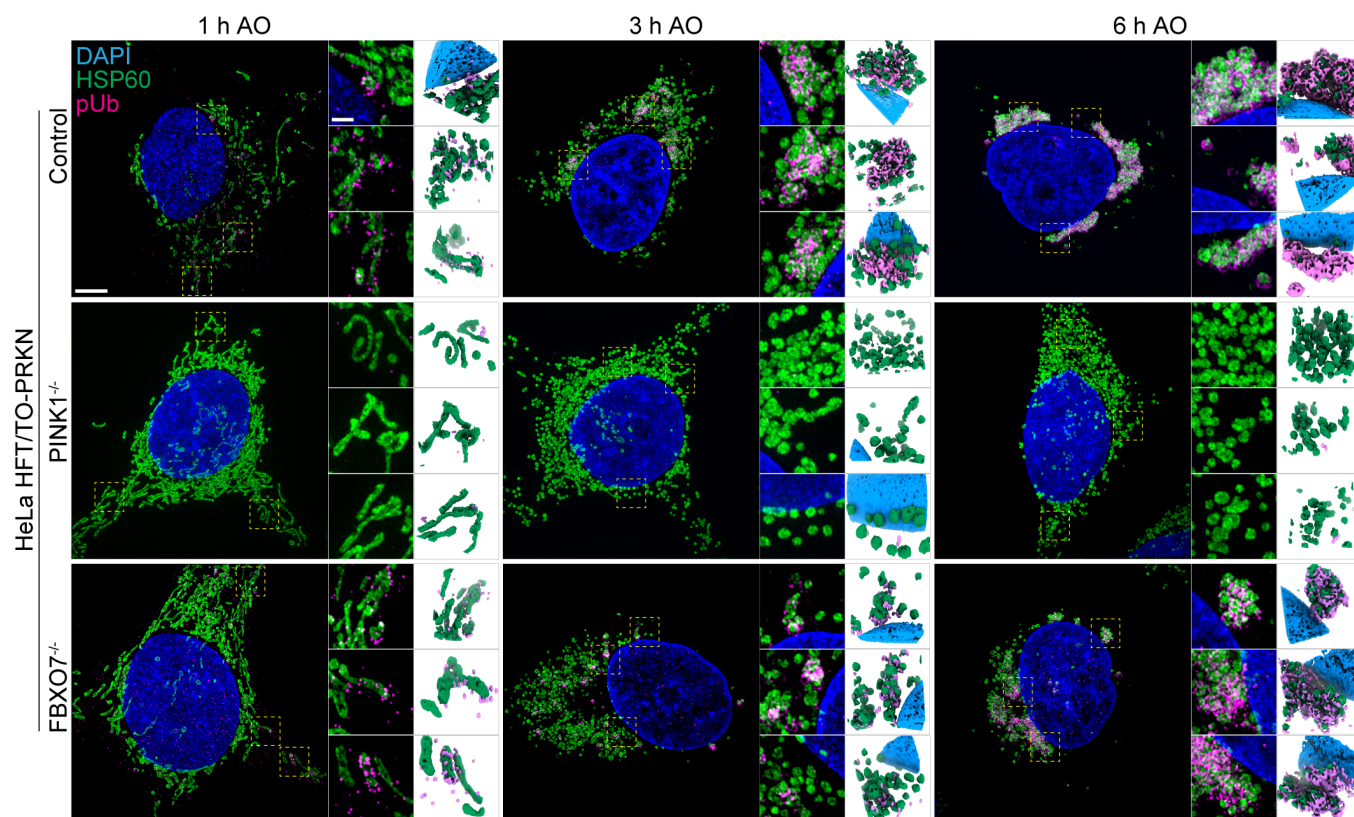

**Figure EV1. Super-resolution pUb detection in HeLa cells in response to mitochondrial depolarization.**

3D-SIM images of HeLa control, PINK1<sup>-/-</sup> and FBXO7<sup>-/-</sup> cell lines after 1 h, 3 h, or 6 h, AO-induced mitophagy (related to Fig 2A and B). Cells were stained for nuclear DNA (DAPI), mitochondria (HSP60) and pUb. Note that 1 h AO panel is reused from Fig 2A for side-by-side comparison. Scale bar = 5  $\mu$ m or 1  $\mu$ m.

**Figure EV2. Parkin and autophagy regulator recruitment in FBXO7<sup>-/-</sup> cells.**

- A Overview of methods for analysis of Parkin recruitment to damaged mitochondria.
- B Cells were imaged for GFP-Parkin, nuclei, and mitochondria and segmented to facilitate analysis of Parkin recruitment to mitochondria in single cells/mitochondrial organelles.
- C Std mitochondrial signal vs. Parkin intensity and Std Parkin vs. mitochondria with or without 1 h AO-induced mitophagy are shown. Data from three replicates, including a total of 238 image stacks, containing 16,888 cells and 237,848 mitochondrial objects.
- D Recruitment of p62 to mitochondria (not stained) in control or FBXO7<sup>-/-</sup> HeLa cells with or without treatment with AO (16 h) was examined by confocal imaging. Scale bar = 10 and 5  $\mu\text{m}$ .
- E, F Quantification of cells in panel (D). Assays were performed in biological triplicate with 4 image stacks taken per repeat.  $n = 6,712$  cells. Error bars depict SD from triplicate experiments from two independent clones. One-way ANOVA with multiple comparisons; \*\*\* $P = 0.0002$ , \* $P = 0.0355$ , \*\* $P = 0.0029$ , \*\*\*\* $P < 0.0001$ .
- G Quantification of number of p62 foci normalized per cell in control, PINK1<sup>-/-</sup> and FBXO7<sup>-/-</sup> cells with or without 3 h AO treatment. Assays were performed in biological triplicate with 4 image stacks taken per repeat.  $n = 12,646$  cells. Error bars depict SD from triplicate experiments from two independent clones. One-way ANOVA with multiple comparisons; \*\*\*\* $P < 0.0001$ .
- H Control or FBXO7<sup>-/-</sup> HeLa cells expressing Parkin were either left untreated or incubated with AO for 1 or 6 h and extracts subjected to Western Blotting with  $\alpha$ -LC3B and  $\alpha$ -Actin as a loading control.
- I The ratio of LC3B lipidation (LC3B-II/LC3B-I) was quantified from triplicate experiments from three independent clones. One-way ANOVA with multiple comparisons. \* $P = 0.0104$ .
- J Immunofluorescence staining of WIPI2 (magenta) and Tom20 (gray) in HeLa Control and FBXO7<sup>-/-</sup> cells after mitophagy induction. Arrows depict WIPI2 foci on the mitochondrial staining. Scale bar = 10  $\mu\text{m}$  (overview) and 10  $\mu\text{m}$  (insets).
- K Evaluation of mitochondrially localized WIPI2 foci per cell based on images shown in (J). Data based on 15 image stacks from three technical replicates of two independent clones. One-way ANOVA with multiple comparisons. \* $P = 0.0331$ .
- L Immunofluorescence staining of HEK293T Control and FBXO7<sup>-/-</sup> cells expressing GFP-Parkin for HSP60 (mitochondria, magenta), pUb (gray) and GFP (Parkin, green) after mitophagy induction for indicated times. Scale bar = 10  $\mu\text{m}$ . Number of individual cells analyzed per condition is indicated in the right bottom of each image.
- M Analysis of pUb intensity (left) and Parkin intensity (right) in the mitochondrial mask. Error bars depict SEM from three biological replicates from two independent clones. 2-way ANOVA with multiple comparisons; \*\* $P = 0.001$ , \*\*\*\* $P < 0.0001$ .



**Figure EV3. Interaction analysis of FBXO7.**

- A Interaction network analysis of PINK1 (left) and FBXO7 (right) based on interaction proteomics data from our BioPlex Interactome (Huttlin *et al*, 2021) (see [Materials and Methods](#) for details). Figure key can be found beneath panel.
- B Summary of major interactions observed for FBXO7 in the context of the relevant protein complexes.
- C Size-exclusion chromatography traces of indicated FBXO7 complexes on Superdex 200 Increase 10/300 GL.
- D SDS-PAGE gel analysis of fractions of SKP1-FBXO7 complexes. Box colors match traces from (C).
- E Ridgeline plots of mtKeima-shift analysis by flow cytometry in HeLa control, PINK1<sup>-/-</sup> and FBXO7<sup>-/-</sup> cell lines treated with AO at the indicated times. All lines are normalized to the BafA sample.



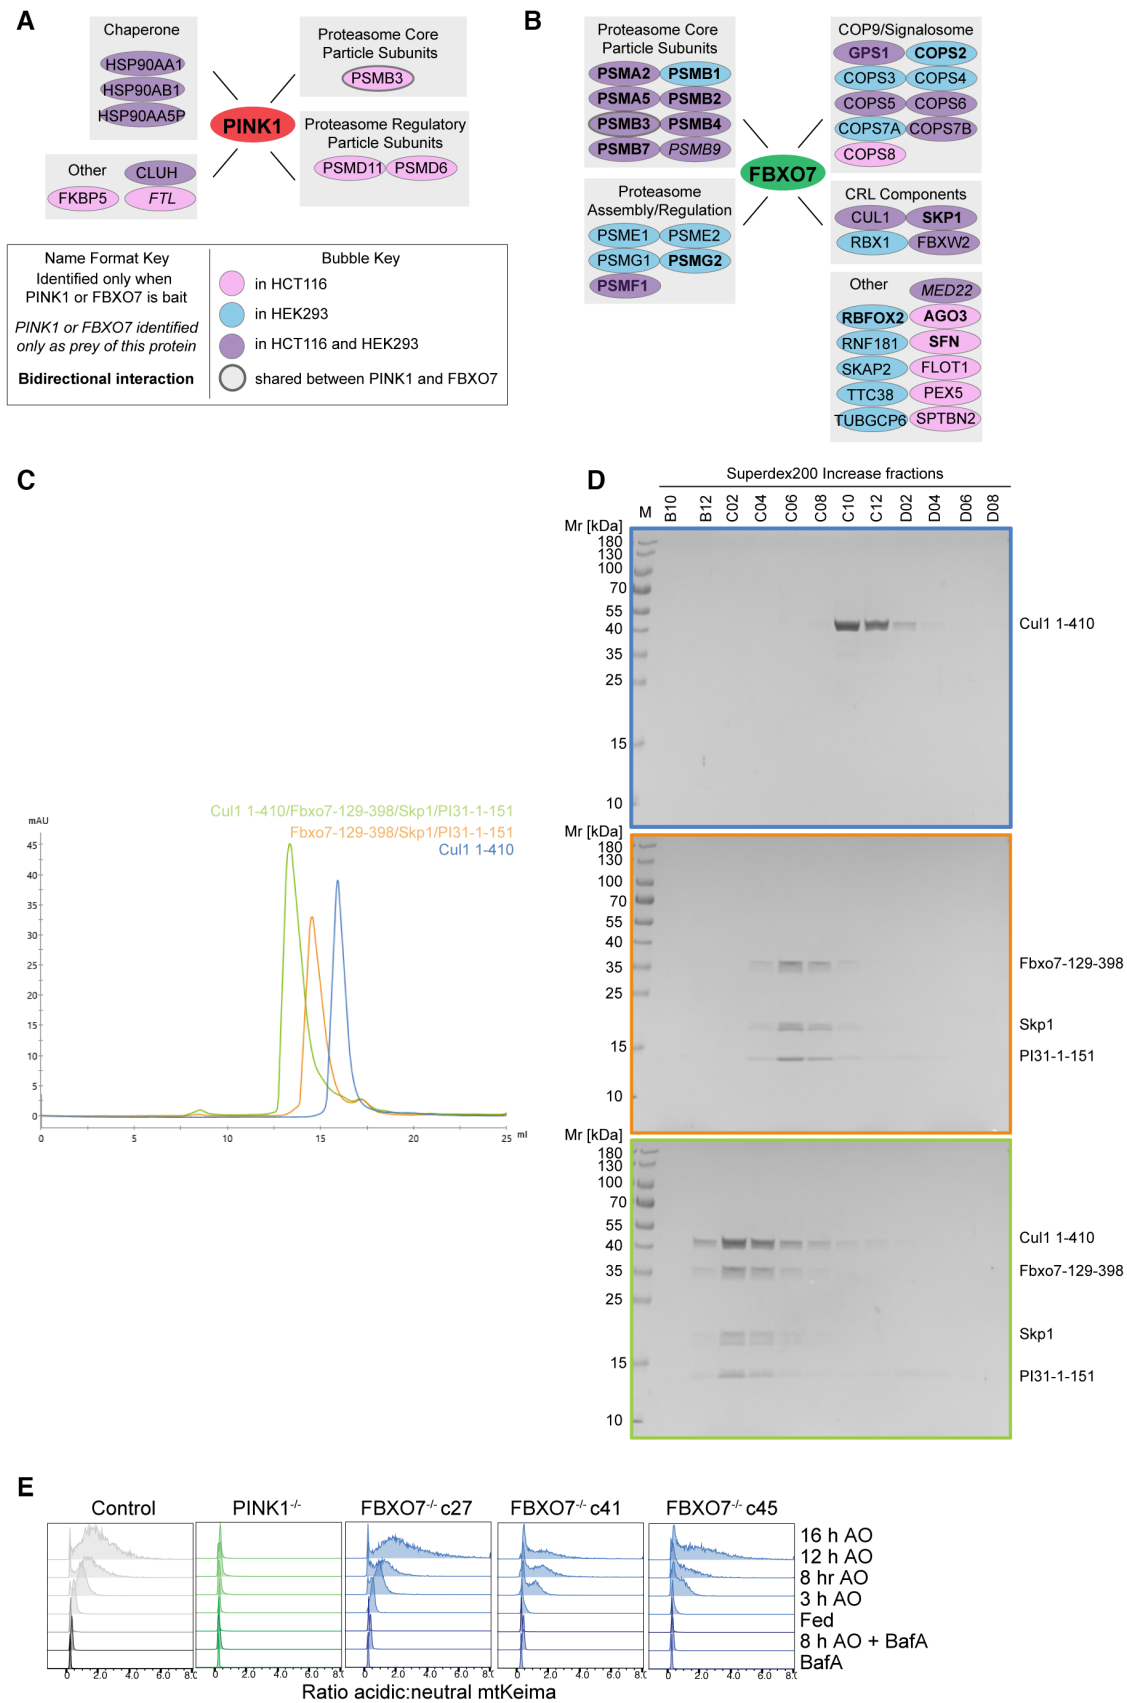

Figure EV3.

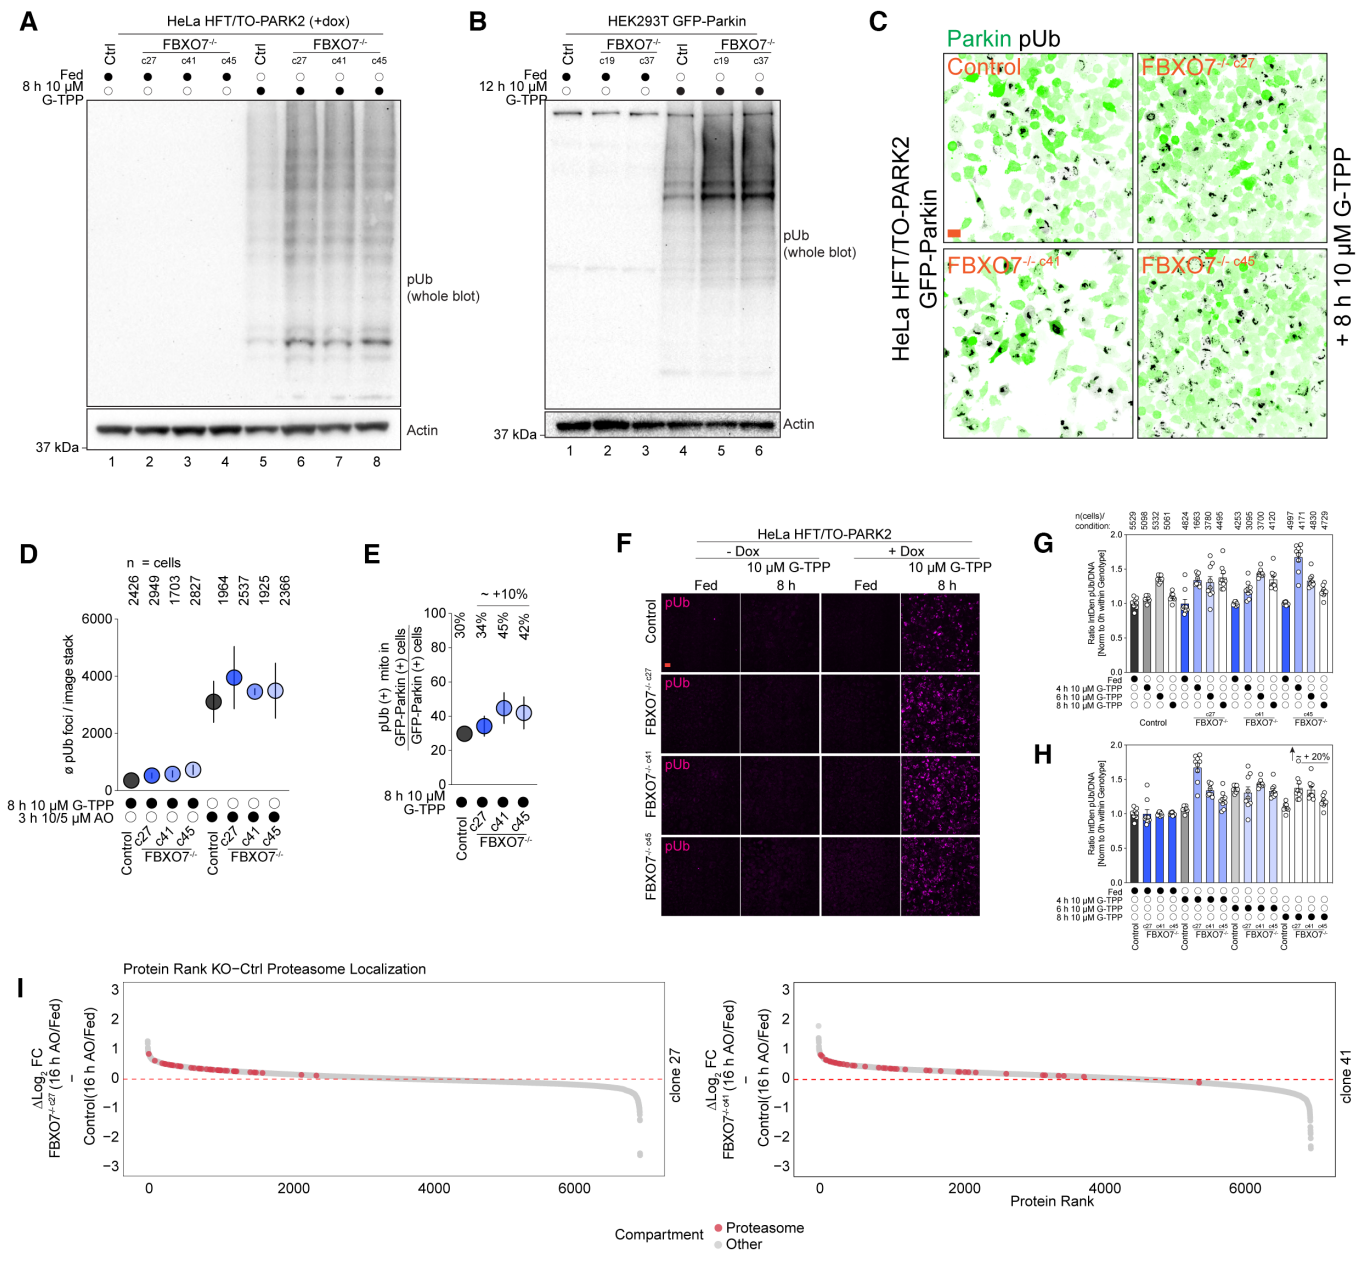

**Figure EV4. Analysis of FBXO7<sup>-/-</sup> response to G-TPP.**

- A** Western Blot for pUb of HeLa Control and FBXO7<sup>-/-</sup> cells after mitophagy induction using G-TPP for indicated times.
- B** Western Blot for pUb of HEK293T Control and FBXO7<sup>-/-</sup> cells after mitophagy induction using G-TPP for indicated times.
- C** Immunofluorescence images of HeLa Control and FBXO7<sup>-/-</sup> cells after G-TPP treatment. Staining for Parkin (GFP, green) and pUb (gray) are shown. Scale bars = 10 μm.
- D, E** Evaluation of mitophagic response to G-TPP in HeLa Control and FBXO7<sup>-/-</sup> cells, based on images from (C). ∅ (average) number of pUb per image stack are plotted. Number of analyzed cells for each condition is indicated in (D). Error bars depict SEM. (E) Ratio of pUb-positive mitochondria in GFP-Parkin-positive cells divided by total number of GFP-Parkin-positive cells as proxy for mitophagy induction rate is plotted. ∅ (average) % numbers for each genotype are indicated above the plot. Error bars depict SEM.
- F** Immunofluorescence images of HeLa Control and FBXO7<sup>-/-</sup> cells after G-TPP timecourse treatment ± doxycycline (= Parkin expression). Staining for pUb (magenta) is shown. Scale bars = 25 μm.
- G, H** Quantification of pUb/DNA integrated density normalized to 0 h treatment within genotype. Panel (H) depicts the measurements sorted by treatment time. N (cells) analyzed per condition is indicated at the bottom of the graph. Error bars depict SEM.
- I** Ranked protein abundance of Δ log<sub>2</sub> (KO[16 h AO/Fed]—Control [16 h AO/Fed]) for FBXO7<sup>-/-</sup> clone 27 (top) and clone 41 (bottom). Proteasomal annotated proteins are depicted red, all other detected proteins in gray.
